# Supplementary material
Source: PubMed Central journal article supplement (PMC8256006)
Supplement: pnas.2026318118.sd02.pdf [file pnas.2026318118.sd02.pdf]

**Dataset S2. PDB cluster codes**

| <b>Cluster Number</b> | <b>PDB</b>                                     | <b>Residues</b>                                 |
|-----------------------|------------------------------------------------|-------------------------------------------------|
| <b>1</b>              | 2ww8                                           | Glu54-Chain A, Glu103-Chain A, Lys731-Chain A   |
|                       | 6o6y                                           | Lys231-Chain A, Glu250-Chain A, Glu422-Chain A  |
|                       | 5gw9                                           | Lys24-Chain A, Asp28-Chain A, Asp110-Chain A    |
|                       | 3oyv                                           | Lys116-Chain A, Glu137-Chain A, Asp147-Chain A  |
|                       | 5xwi                                           | Glu279-Chain A, Lys330-Chain A, Asp334-Chain A  |
|                       | 5k4b                                           | Lys248-Chain A, Glu350-Chain A, Glu359-Chain B  |
|                       | 4q8k                                           | Glu188-Chain A, Glu221-Chain A, Lys349-Chain A  |
|                       | 5ziq                                           | Lys129-Chain B, Glu186-Chain B, Glu190-Chain B  |
|                       | 4xxl                                           | Glu72-Chain A, Lys108-Chain A, Asp112-Chain A   |
|                       | 6os7                                           | Lys183-Chain A, Glu200-Chain A, Glu357-Chain B  |
|                       | 3drf                                           | Asp504-Chain A, Lys525-Chain A, Asp529-Chain A  |
|                       | 3l1n                                           | Lys30-Chain A, Asp34-Chain A, Asp49-Chain A     |
|                       | 3k6o                                           | Asp119-Chain A, Lys193-Chain B, Asp195-Chain B  |
|                       | 6sa9                                           | Asp55-Chain A, Lys31-Chain B, Asp35-Chain B     |
|                       | 5dl8                                           | Lys300-Chain B, Glu303-Chain B, Glu343-Chain B  |
|                       | 3pty                                           | Lys747-Chain A, Asp754-Chain A, Asp1051-Chain A |
| 2pd2                  | Glu33-Chain B, Glu94-Chain B, Lys98-Chain B    |                                                 |
| <b>2</b>              | 2o16                                           | Asp134-Chain A, Lys63-Chain B, Asp134-Chain B   |
|                       | 2zod                                           | Asp136-Chain A, Lys140-Chain A, Asp136-Chain B  |
|                       | 3cra                                           | Lys119-Chain A, Glu122-Chain A, Asp61-Chain B   |
|                       | 6lce                                           | Asp129-Chain A, Lys134-Chain A, Glu151-Chain A  |
|                       | 3cay                                           | Glu7-Chain C, Glu18-Chain J, Lys22-Chain J      |
|                       | 5xwi                                           | Glu58-Chain A, Lys234-Chain A, Glu309-Chain A   |
|                       | 5x93                                           | Glu299-Chain A, Lys303-Chain A, Glu1021-Chain A |
|                       | 3m6z                                           | Asp31-Chain A, Glu123-Chain A, Lys282-Chain A   |
|                       | 3lp5                                           | Lys73-Chain A, Asp77-Chain A, Glu153-Chain A    |
|                       | 4u9v                                           | Lys97-Chain B, Glu100-Chain B, Glu139-Chain B   |
|                       | 2xu3                                           | Lys17-Chain A, Glu50-Chain A, Glu86-Chain A     |
|                       | 3ot2                                           | Glu28-Chain A, Lys123-Chain A, Asp159-Chain B   |
|                       | 5dwa                                           | Glu173-Chain A, Asp223-Chain A, Lys224-Chain A  |
|                       | 3m6z                                           | Asp31-Chain B, Glu123-Chain B, Lys282-Chain B   |
| 3hr0                  | Asp538-Chain A, Lys541-Chain A, Glu662-Chain A |                                                 |
| <b>3</b>              | 3lrk                                           | Asp35-Chain A, Asp72-Chain A, Lys147-Chain A    |
|                       | 5coz                                           | Glu306-Chain A, Lys309-Chain A, Asp368-Chain A  |
|                       | 2ygk                                           | Glu77-Chain A, Lys304-Chain A, Asp308-Chain A   |
|                       | 4whn                                           | Glu9-Chain C, Glu13-Chain C, Lys49-Chain C      |
|                       | 3sd7                                           | Asp11-Chain A, Lys144-Chain A, Asp172-Chain A   |
|                       | 4yn8                                           | Asp8-Chain A, Asp50-Chain A, Lys99-Chain A      |
|                       | 4i90                                           | Glu207-Chain A, Asp210-Chain A, Lys214-Chain A  |

|   |      |                                                   |
|---|------|---------------------------------------------------|
|   | 6kqs | Asp100-Chain A, Lys453-Chain A, Glu497-Chain A    |
|   | 4ri2 | Lys34-Chain A, Glu37-Chain A, Asp98-Chain A       |
| 4 | 4zr8 | Glu92-Chain B, Glu95-Chain B, Lys98-Chain B       |
|   | 5fc2 | Glu1773-Chain B, Lys1776-Chain B, Glu1777-Chain B |
|   | 4hye | Glu141-Chain A, Glu143-Chain B, Lys180-Chain B    |
|   | 3e6c | Lys62-Chain C, Asp64-Chain C, Glu72-Chain C       |
|   | 1c3c | Lys387-Chain A, Glu391-Chain A, Glu395-Chain A    |
|   | 4qdc | Lys166-Chain A, Glu298-Chain A, Glu302-Chain A    |
|   | 3mgg | Lys224-Chain A, Glu235-Chain A, Glu239-Chain A    |
| 5 | 3nua | Glu91-Chain A, Lys178-Chain A, Glu180-Chain A     |
|   | 3sdb | Asp372-Chain A, Asp482-Chain A, Lys510-Chain A    |
|   | 4q6j | Glu36-Chain A, Glu122-Chain A, Lys173-Chain A     |
|   | 5gt5 | Lys271-Chain A, Asp272-Chain A, Asp296-Chain A    |
|   | 4wep | Asp92-Chain A, Asp95-Chain A, Lys107-Chain A      |
|   | 3q1n | Lys216-Chain A, Asp231-Chain A, Glu291-Chain A    |
| 6 | 2zfn | Lys105-Chain A, Glu109-Chain A, Glu232-Chain A    |
|   | 4z39 | Glu21-Chain A, Lys28-Chain A, Asp116-Chain B      |
|   | 3i42 | Glu25-Chain A, Asp69-Chain A, Lys120-Chain A      |
|   | 5ytq | Lys69-Chain A, Glu72-Chain A, Glu39-Chain B       |
|   | 2qvg | Glu14-Chain A, Asp66-Chain A, Lys118-Chain A      |
|   | 5x5j | Glu19-Chain A, Asp63-Chain A, Lys112-Chain A      |
| 7 | 4hzi | Glu236-Chain A, Glu240-Chain A, Lys261-Chain A    |
|   | 4i6k | Glu132-Chain A, Asp157-Chain A, Lys188-Chain A    |
|   | 5jaz | Lys205-Chain A, Asp231-Chain A, Glu318-Chain A    |
|   | 5i6r | Lys6-Chain A, Glu12-Chain A, Glu16-Chain A        |
|   | 2xxp | Lys172-Chain A, Glu195-Chain A, Asp454-Chain A    |
|   | 3o3o | Asp82-Chain A, Lys347-Chain A, Glu329-Chain B     |
| 8 | 2yk4 | Glu159-Chain A, Lys161-Chain A, Asp209-Chain A    |
|   | 6w40 | Glu3-Chain A, Asp73-Chain B, Lys75-Chain B        |
|   | 2rc3 | Lys24-Chain A, Glu32-Chain A, Asp146-Chain A      |
|   | 6dyf | Glu18-Chain A, Glu92-Chain A, Lys95-Chain A       |
|   | 3mvp | Lys151-Chain A, Asp179-Chain A, Glu187-Chain B    |
|   | 5cdv | Glu246-Chain A, Asp329-Chain A, Lys346-Chain A    |
